# Supplementary material for: Investigating the properties of PODIPYs (phosphorus-dipyrromethene) with ab initio tools
Source: Royal Society of Chemistry journal article supplement (doi:10.1039/c5cp05653e), 2015-10-23
Supplement: c5cp05653e1.pdf [file c5cp05653e1.pdf]

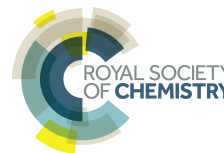

# Journal Name

## ARTICLE TYPE

Cite this: DOI: 10.1039/xxxxxxxxxx

## Investigating the properties of PODIPY (Phosphorous-Dipyrromethene) with *ab initio* tools: ESI

Arnaud Fihey,<sup>a</sup> Anthony Favennec,<sup>a</sup> Boris Le Guennic<sup>\*b</sup> and Denis Jacquemin<sup>\*a,c</sup>

Received Date  
Accepted Date

DOI: 10.1039/xxxxxxxxxx

[www.rsc.org/journalname](http://www.rsc.org/journalname)

<sup>a</sup> Chimie Et Interdisciplinarité, Synthèse, Analyse, Modélisation (CEISAM), UMR CNRS no. 6230, BP 92208, Université de Nantes, 2, Rue de la Houssinière, 44322 Nantes, Cedex 3, France; E-mail: Denis.Jacquemin@univ-nantes.fr

<sup>b</sup> Institut des Sciences Chimiques de Rennes, UMR 6226 CNRS-Université de Rennes 1, 263 Av. du Général Leclerc, 35042 Rennes Cedex, France; E-mail: Boris.leguennic@univ-rennes1.fr

<sup>c</sup> Institut Universitaire de France, 103 bd St. Michel, 75005 Paris Cedex 5, France

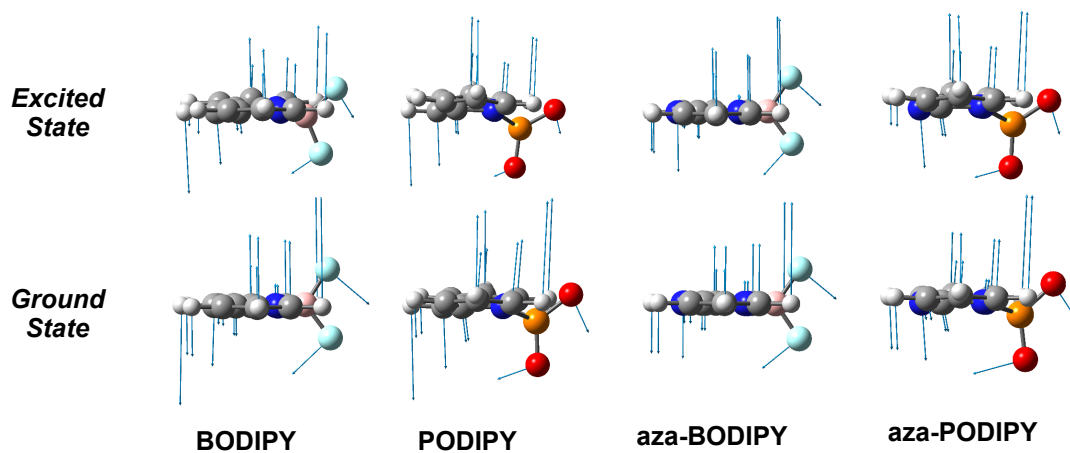

**Fig. ESI-1** Representation of the displacements corresponding to the low-frequency vibronic modes (mostly) responsible for the broadening of the spectra.

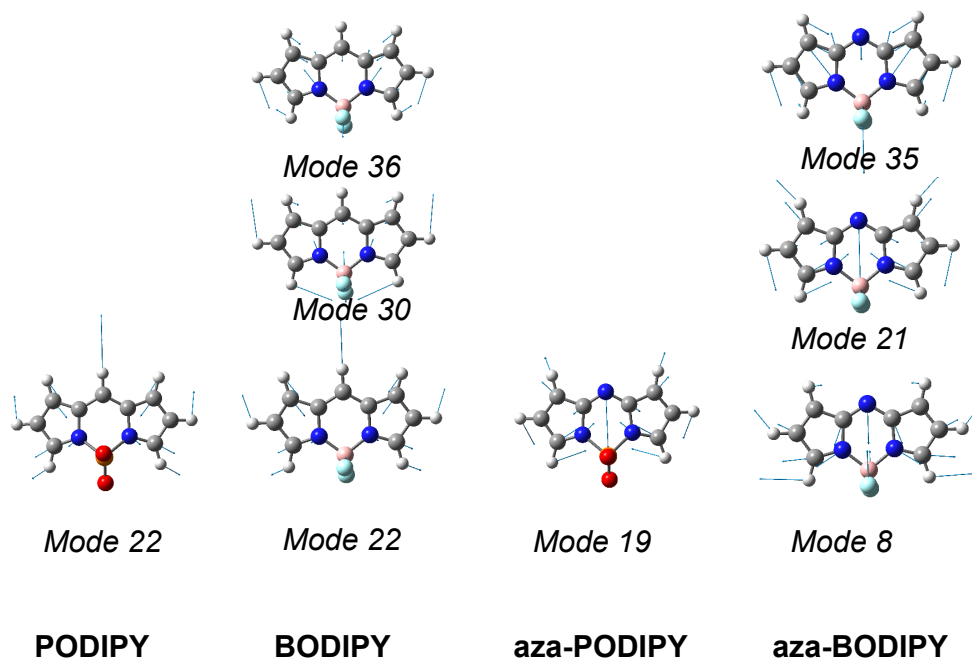

**Fig. ESI-2** Representation of the displacements corresponding to the vibronic modes (mostly) responsible for the shoulder in the absorption spectrum. Note that they corresponds to vibration of the excited-state.

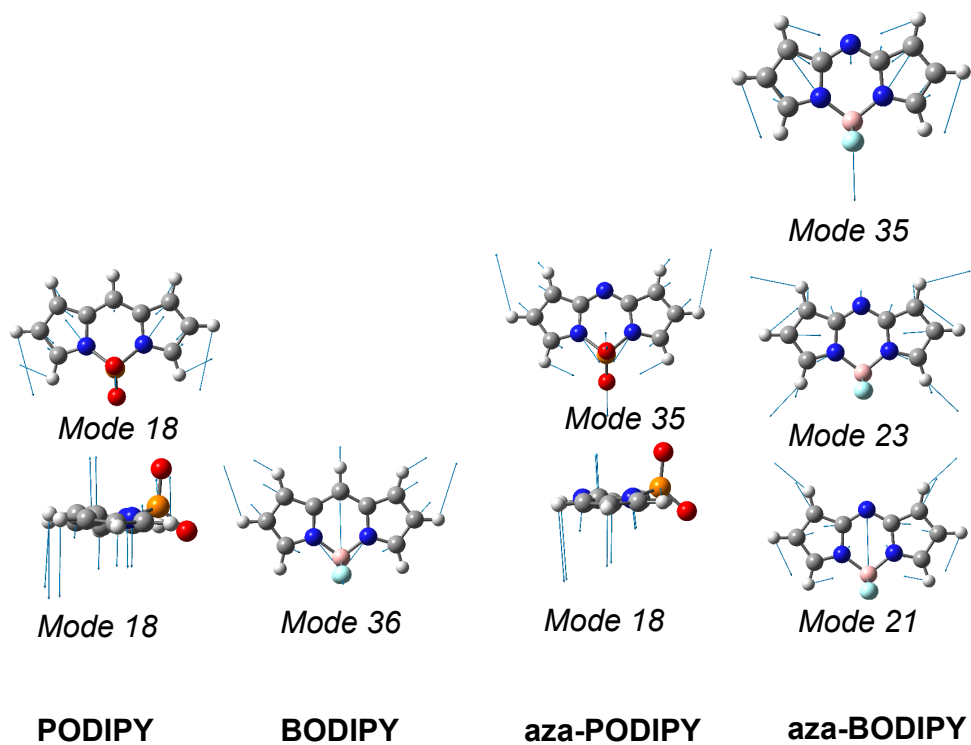

**Fig. ESI-3** Representation of the displacements corresponding to the vibronic modes (mostly) responsible for the shoulder in the emission spectrum. Note that they corresponds to vibration of the ground-state.

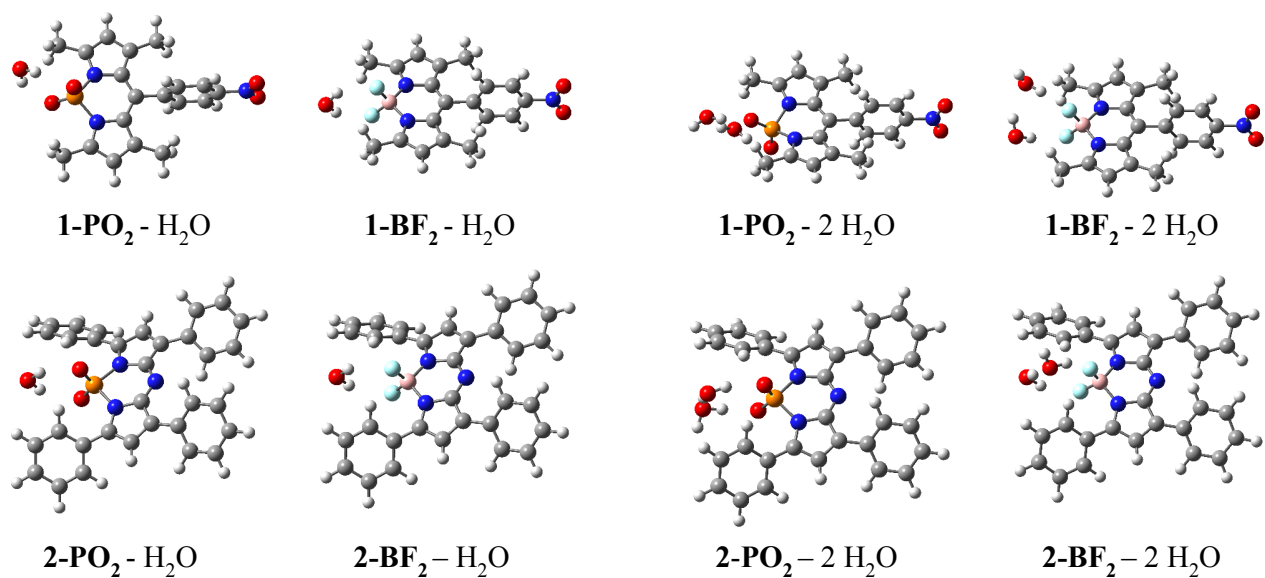

**Fig. ESI-4** Equilibrium geometries for water complexes with **1-PO<sub>2</sub>**, **1-BF<sub>2</sub>**, **2-PO<sub>2</sub>** and **2-BF<sub>2</sub>**. Structures with one and two water molecules are presented on the left-hand-side and right-hand-side of the figure, respectively.

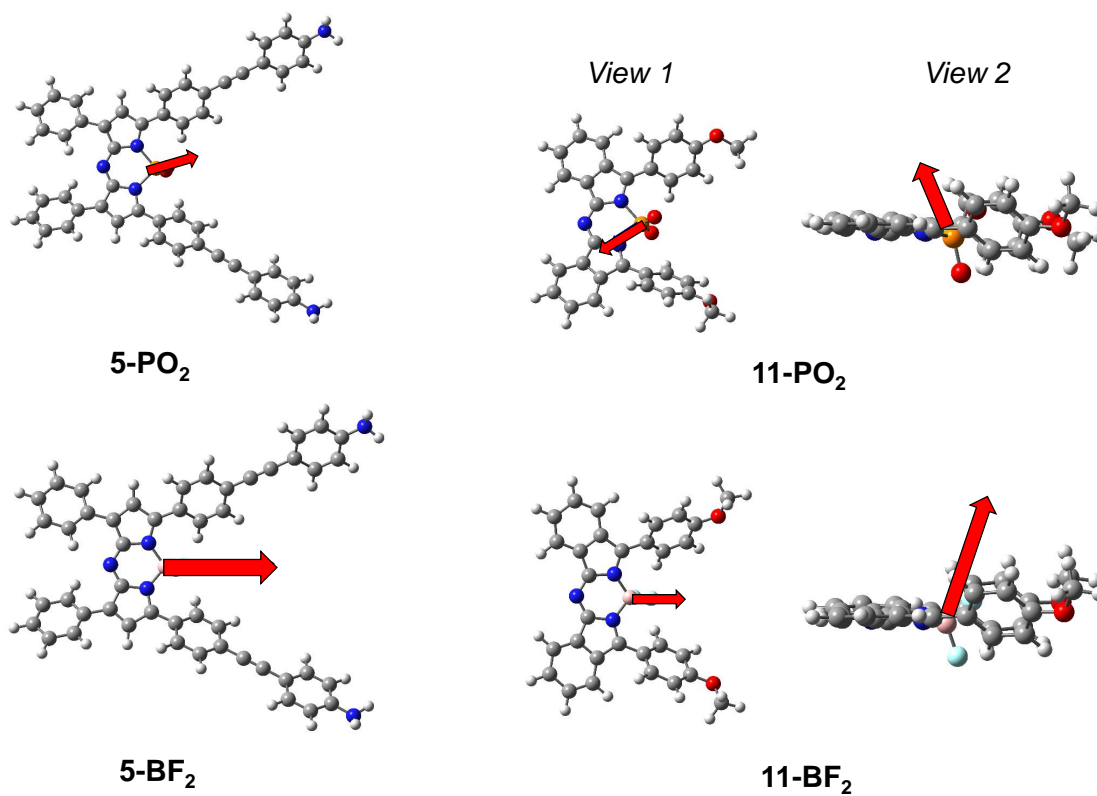

Fig. ESI-5 Ground state total dipole moments in 5 and 11.
